# Supplementary material for: Does the management of surrounding terrestrial habitats increase the tendency of odonates to leave aquatic habitats?
Source: Springer Nature journal article supplement (doi:10.1007/s10531-017-1350-8), 2017-04-22
Supplement: MOESM1 [file 12240208]

Appendix 1. Position of study areas, their management and surroundings

| **Site** | **GPS N** | **GPS E** | **Fish farming** | **Surroundings** |
| --- | --- | --- | --- | --- |
| Loc.1 | 48.98194 | 14.57265 | absent | grassland |
| Loc.2 | 50.67126 | 14.66686 | present | grassland |
| Loc.3 | 49.63516 | 18.1014 | absent | grassland |
| Loc.4 | 50.70078 | 14.49487 | absent | field |
| Loc.5 | 49.8796 | 18.17509 | absent | field |
| Loc.6 | 50.16191 | 12.9611 | present | grassland |
| Loc.7 | 49.20658 | 15.04657 | present | field |
| Loc.8 | 50.60993 | 14.72213 | absent | forest |
| Loc.9 | 49.78697 | 18.4067 | absent | forest |
| Loc.10 | 49.20096 | 15.03406 | absent | forest |
| Loc.11 | 50.17243 | 13.03621 | absent | grassland |
| Loc.12 | 49.46777 | 17.9996 | absent | field |
| Loc.13 | 49.51899 | 17.9052 | absent | grassland |
| Loc.14 | 49.0295 | 14.55456 | absent | field |
| Loc.15 | 49.73729 | 18.1148 | present | field |
| Loc.16 | 49.82811 | 18.50131 | absent | grassland |
| Loc.17 | 50.13245 | 13.07099 | absent | grassland |
| Loc.18 | 50.70966 | 14.51237 | present | field |
| Loc.19 | 50.14415 | 12.96117 | absent | grassland |
| Loc.20 | 49.81389 | 18.44567 | absent | forest |
| Loc.21 | 48.97364 | 14.3249 | present | field |
| Loc.22 | 50.70352 | 14.4703 | present | field |
| Loc.23 | 49.70479 | 18.0786 | present | grassland |
| Loc.24 | 49.88363 | 18.17118 | absent | field |
| Loc.25 | 50.12904 | 13.06219 | absent | grassland |
| Loc.26 | 49.68256 | 18.1838 | present | field |
| Loc.27 | 50.13927 | 13.06958 | absent | grassland |
| Loc.28 | 48.99933 | 14.57703 | present | field |

Appendix 2. Species list and the frequency of occurrence of individual species detected during the study

| **Species** | **Frequency** |
| --- | --- |
| *Aeshna affinis* | 6 |
| *Aeshna cyanea* | 12 |
| *Aeshna grandis* | 10 |
| *Aeshna juncea* | 2 |
| *Aeshna mixta* | 28 |
| *Anaciaeschna isoceles* | 8 |
| *Anax imperator* | 24 |
| *Anax parthenope* | 6 |
| *Brachytron pratense* | 1 |
| *Calopteryx splendens* | 6 |
| *Calopteryx virgo* | 5 |
| *Coenagrion hastulatum* | 4 |
| *Coenagrion lunulatum* | 2 |
| *Coenagrion puella* | 28 |
| *Coenagrion pulchellum* | 1 |
| *Cordulegaster boltonii* | 1 |
| *Cordulia aenea* | 17 |
| *Crocothemis erythraea* | 5 |
| *Enallagma cyathigerum* | 22 |
| *Erythromma najas* | 21 |
| *Erythromma viridulum* | 9 |
| *Chalcolestes viridis* | 17 |
| *Ischnura elegans* | 27 |
| *Ischnura pumilio* | 8 |
| *Lestes barbarus* | 1 |
| *Lestes dryas* | 4 |
| *Lestes sponsa* | 28 |
| *Lestes virens* | 4 |
| *Leucorrhinia albifrons* | 1 |
| *Leucorrhinia pectoralis* | 4 |
| *Leucorrhinia rubicunda* | 1 |
| *Libellula depressa* | 18 |
| *Libellula quadrimaculata* | 18 |
| *Orthetrum albistylum* | 6 |
| *Orthetrum cancellatum* | 24 |
| *Platycnemis pennipes* | 11 |
| *Somatochlora flavomaculata* | 1 |
| *Somatochlora metallica* | 9 |
| *Sympecma fusca* | 16 |
| *Sympecma paedisca* | 2 |
| *Sympetrum danae* | 3 |
| *Sympetrum depressiusculum* | 2 |
| *Sympetrum flaveolum* | 6 |
| *Sympetrum fonscolombii* | 5 |
| *Sympetrum meridionale* | 1 |
| *Sympetrum sanguineum* | 27 |
| *Sympetrum striolatum* | 8 |
| *Sympetrum vulgatum* | 22 |
| **Sum = 48** |  |
